# Supplementary material for: A biomass carbon mass coated with modified TiO2 nanotube/graphene for photocatalysis
Source: Royal Society of Chemistry journal article supplement (doi:10.1039/c6nj04005e), 2017-01-01
Supplement: c6nj04005e1.pdf [file c6nj04005e1.pdf]

Supporting Information:

## A biomass carbon mass coated with modified TiO<sub>2</sub> nanotubes/graphene for photocatalysis

*Yiren Lian<sup>a,b,c</sup>, Wenkun Zhu<sup>a</sup>, Weitang Yao<sup>a</sup>, Huan Yi<sup>a</sup>, Zuowen Hu<sup>b\*</sup>,*

*Tao Duan<sup>a\*</sup>, Wencai Cheng<sup>a</sup>, Xianfeng Wei<sup>a</sup> and Guozhen Hu<sup>b</sup>*

- a. Laboratory of Extreme Conditions Matter Properties, Southwest University of Science and Technology, Mianyang, 621010, China
- b. CAEP Institute of Technology, Mianyang, Sichuan, 621900, China.
- c. Graduate School of CAEP, Mianyang, Sichuan, 621900, China.

\*Email address: [duant@ustc.edu.cn](mailto:duant@ustc.edu.cn)

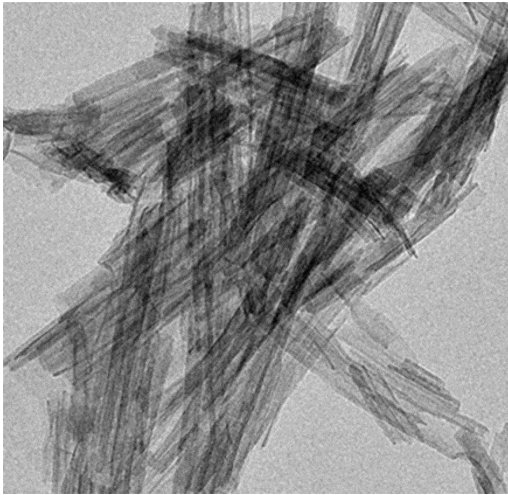

**Fig. S1** The TEM image of the aggregation of nanotubes in composite.

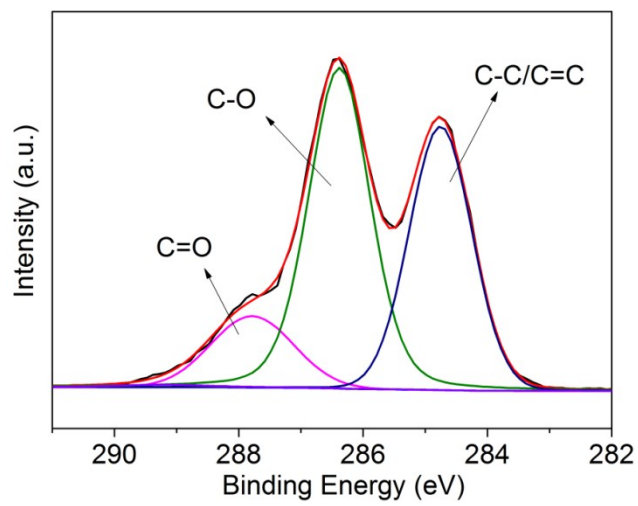

**Fig. S2** The C 1s high resolution XPS spectra of GO.

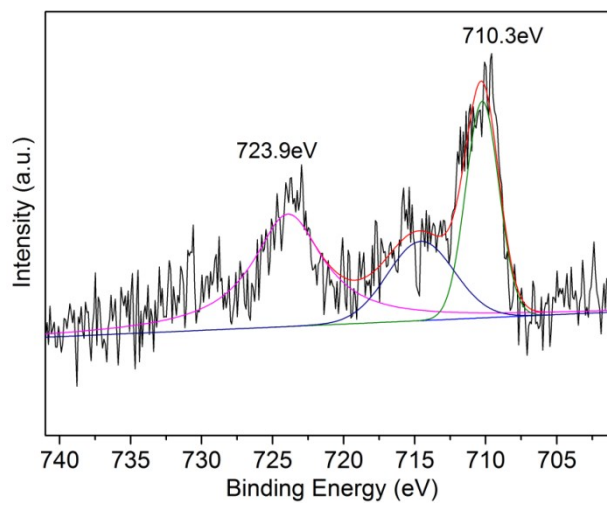

**Fig. S3** The Fe 2p high resolution XPS spectra of Fe<sub>2</sub>O<sub>3</sub>.

**Table S1**

Different Fe/N-TNTs/NG composites for the degradation of methylene blue at same condition.

| Parameters  | 1     | 2     | 3     | 4     | 5     | 6     | 7     | 8     | 9     | 10    |
|-------------|-------|-------|-------|-------|-------|-------|-------|-------|-------|-------|
| Fe/TNTs (%) | 0     | 0     | 0     | 0     | 1     | 1     | 2.8   | 3.4   | 3.8   | 4     |
| N/TNTs      | 0     | 0.5   | 3     | 10    | 0     | 3     | 4.2   | 3.4   | 6     | 4     |
| $C/C_0$     | 0.211 | 0.392 | 0.701 | 0.509 | 0.409 | 0.811 | 0.918 | 0.941 | 0.886 | 0.956 |

  

| 11    | 12    | 13    | 14    | 15    | 16    | 17    | 18    | 19    | 20    |
|-------|-------|-------|-------|-------|-------|-------|-------|-------|-------|
| 4.6   | 5     | 5     | 5     | 5     | 5     | 7     | 10    | 10    | 10    |
| 4     | 6     | 0     | 0.5   | 3     | 10    | 3     | 0     | 3     | 10    |
| 0.933 | 0.852 | 0.523 | 0.795 | 0.889 | 0.645 | 0.693 | 0.181 | 0.452 | 0.204 |

**Note:** Fe/TNTs ( $10^2 \cdot \text{g/g}$ ) is the mass ratio of  $\text{Fe}(\text{NO}_3)_3 \cdot 9\text{H}_2\text{O}$  and TNTs; N/TNTs ( $\text{g/g}$ ) is the mass ratio of urea and TNTs; C is the concentration of methylene blue and  $C_0$  is the initial concentration of methylene blue.

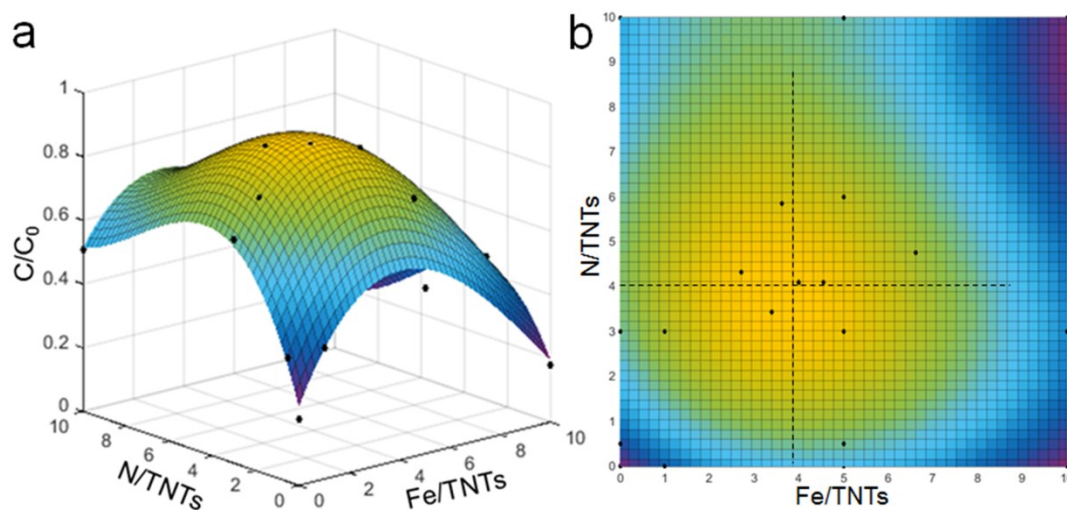

**Fig. S4** (a) 3D fitting curved surface for the effect of sample N/TNTs and Fe/TNTs on degradation of methylene blue and (b) the planform of the 3D fitting curved surface.

Considering the different photocatalytic performance of Fe/N-TNTs/NG composites with

different contents of Fe and N elements, it was necessary to study the photocatalytic activities of Fe/N-TNTs/NG composites with different additions of urea and  $\text{Fe}(\text{NO}_3)_3 \cdot 9\text{H}_2\text{O}$ . As shown in Fig. S4a, Twenty different groups of Fe/N-TNTs/NG samples displayed their different photocatalytic degradation efficiencies within 100 min under the same condition and the data was analyzed by a polynomial fitting. As a result, a 3D fitting curved surface formed and demonstrated the effect of different N/TNTs and Fe/TNTs on methylene blue degradation. Fig. S4b shows the planform of the 3D fitting curved surface, it is easy to find that the center of luminous yellow area was near the coordinate (4, 4). That means the sample of Fe/N-TNTs/NG at the ratios of N/TNTs (4:1) and Fe/TNTs (4:1) present the best photocatalytic performance.

**Table S2**

The bonding energy of each element on TNTs/GO, N-TNTs/NG and Fe/N-TNTs/NG.

| Element | Chemical bonds       | Bonding Energy (eV) |           |              |
|---------|----------------------|---------------------|-----------|--------------|
|         |                      | TNTs/GO             | N-TNTs/NG | Fe/N-TNTs/NG |
| O1s     | C-O                  | 530.38              | 530.49    | 530.53       |
|         | O-Ti-N               | —                   | 531.42    | 531.39       |
|         | O-Ti                 | 532.61              | 532.59    | 532.67       |
| C1s     | C=C                  | 284.75              | 284.74    | 284.74       |
|         | C=N/C-O              | 286.62              | 285.35    | 285.33       |
|         | C-N/C=O              | 287.33              | 287.72    | 286.74       |
| Ti 2p   | Ti-O-C               | 289.24              | 289.19    | 289.20       |
|         | Ti 2p <sub>1/2</sub> | 464.81              | 464.79    | 464.71       |
|         | Ti 2p <sub>3/2</sub> | 459.15              | 459.11    | 458.94       |
| N1s     | Pyridinic N          | —                   | 398.55    | 398.52       |
|         | Pyrrolic N/O-Ti-N    | —                   | 400.06    | 400.02       |
|         | Quaternary N         | —                   | 401.59    | 401.64       |
| Fe 2p   | Fe 2p <sub>3/2</sub> | —                   | —         | 711.50       |
|         | Fe 2p <sub>1/2</sub> | —                   | —         | 724.80       |

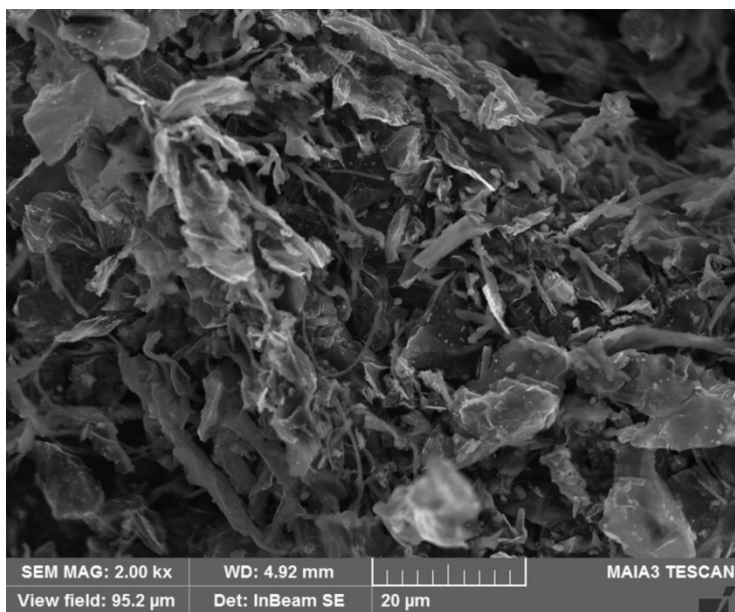

**Fig. S5** SEM image of FH~Fe/N-TNTs/NG after the fourth cycle.
